# Supplementary material
Source: Frontiers journal article supplement (https://www.frontiersin.org/articles/514106)
Supplement: Data_Sheet_1.PDF [file Data_Sheet_1.PDF]

## Supporting information for

### Solid acid resin Amberlyst 45 as catalyst for the transesterification of vegetable oil

Natalia Mariano Cabral,<sup>a</sup> Juliana P. Lorenti,<sup>a</sup> Winfried Plass,<sup>b</sup> Jean Marcel R. Gallo<sup>a,b,\*</sup>

<sup>a</sup>Group of Renewable Energy, Nanotechnology, and Catalysis (GreenCat), [www.greencat.ufscar.br](http://www.greencat.ufscar.br), Department of Chemistry, Federal University of São Carlos, Rod. Washington Luis, KM 235, CEP 13565-905, PO Box 676, São Carlos-SP, Brazil.

<sup>b</sup> Institute of Inorganic and Analytical Chemistry, Friedrich Schiller University Jena, Jena, Humboldtstr. 8, 07743 Jena, Germany.

\*[jean@ufscar.br](mailto:jean@ufscar.br)

#### 1. Effect of the oil/alcohol ratio at 60 min

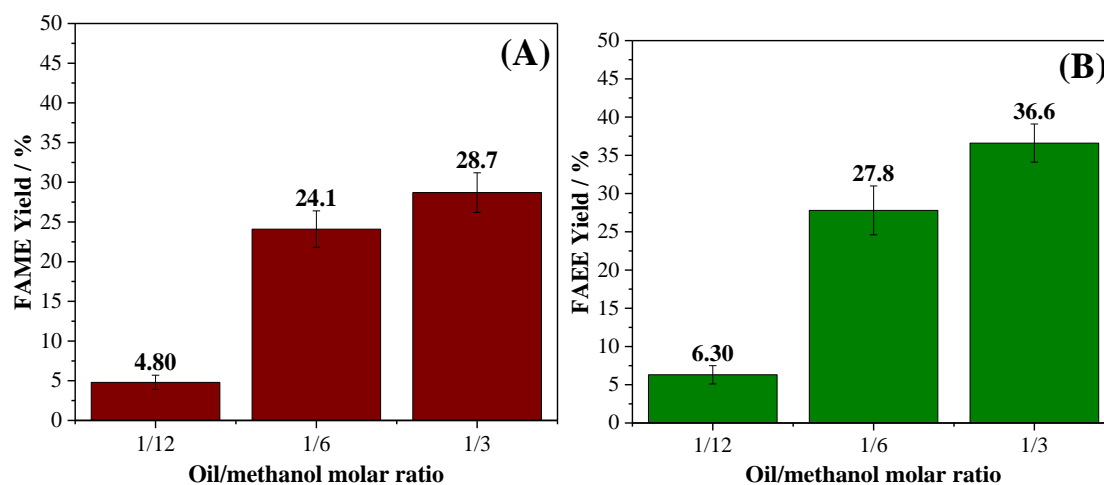

**Figure S1.** Effect of the oil/alcohol molar ratio [(A) methanol; (B) ethanol] in reaction performed at 150 °C for 60 min using 10 wt. % of Amberlyst 45.

## 2. Methanolysis vs. Ethanolysis

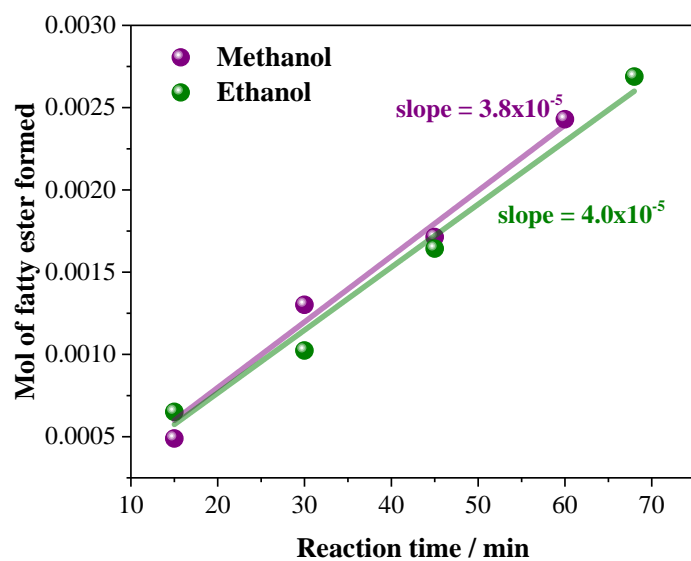

**Figure S2.** Fatty acid formation as a function of time for methanol and ethanol

### 3. Reaction of ethanol etherification

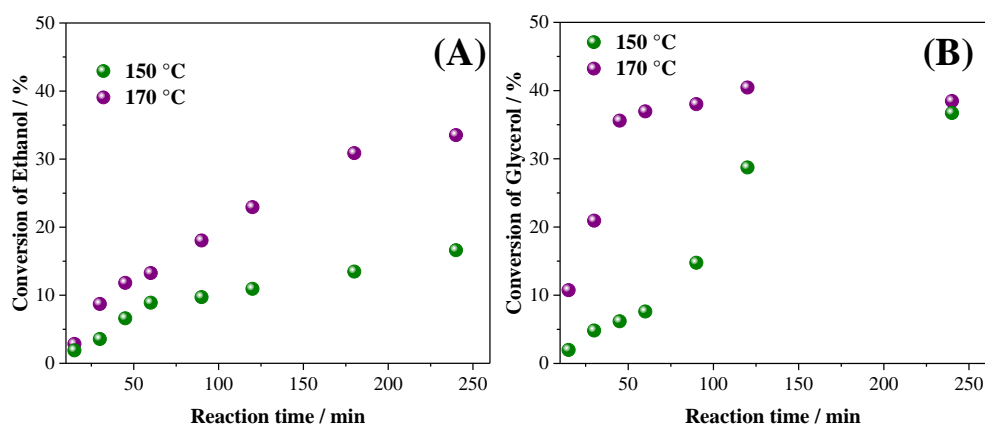

**Figure S3.** (A) Conversion of ethanol to diethyl ether and (B) Conversion of Glycerol by etherification with ethanol.

**Table S1.** Initial Turnover Frequency (TOF) for formation of FAEE, diethyl ether, and glycerol ethyl ethers.

| Product                              | TOF / h <sup>-1</sup> |        |
|--------------------------------------|-----------------------|--------|
|                                      | 150 °C                | 170 °C |
| FAEE <sup>1</sup>                    | 1.1                   | 4.1    |
| Diethyl ether <sup>2</sup>           | 4.8                   | 18.0   |
| Glycerol ethyl ethers <sup>1,2</sup> | 4.1                   | 13.9   |

<sup>1</sup> oil/ethanol and glycerol/ethanol molar ratio of 1/6; <sup>2</sup> TOF for etherification reaction were determined individually;

Turnover Frequency (TOF) was given as:

**TOF**

$$= \frac{(\text{mol ester formed})}{(\text{catalyst weight}) \times (\text{acid sites by gram of catalyst}) \times (\text{reaction time})}$$

#### 4. Stability test in fixed bed continuous flow reactor

##### 4.1. Experimental setup for stability studies in a continuous flow reactor

Catalyst stability studies were carried out in a stainless-steel fixed-bed continuous flow reactor. Amberlyst 45 (3.00 g) was placed in the reactor between glass-wool plugs to avoid displacement of the catalyst bed. Two HPLC pump Jasco PU-2080Plus were used to feed the reactor with oil and alcohol with a total flow of  $0.2 \text{ mL min}^{-1}$  (oil/alcohol molar ratio of 1/6). The reaction was performed at  $170 \text{ }^{\circ}\text{C}$  for 48 h.

##### 4.2. Results

Although recycling the catalysts in batch reactors showed that Amberlyst 45 does not deactivate during the reaction, deactivation experiments in fixed bed flow reactor were carried out seeking a more quantitative result (**Figure S2**). A curve of  $\ln(\text{rate})$  as a function of time of stream was built in order to obtain the first order deactivation constant, which was  $0.0256 \text{ h}^{-1}$  for Amberlyst 45. For sake of comparison, Amberlyst 15, an acid resin with maximum operation temperature of  $130 \text{ }^{\circ}\text{C}$ , was also tested and presented a deactivation constant 35 % lower. Indeed, Amberlyst 45 was not only more stable, but also more active, presenting an initial TOF of  $0.2 \text{ h}^{-1}$ , versus  $0.12 \text{ h}^{-1}$  for Amberlyst 15. Compared to the reaction in batch reactor, the use of Amberlyst 45 in the fixed bed continuous flow reactor led to a TOF 8.5 times lower (Erro! Fonte de referência não encontrada.). This suggests that problems of functional group leaching and/or diffusion could be present.

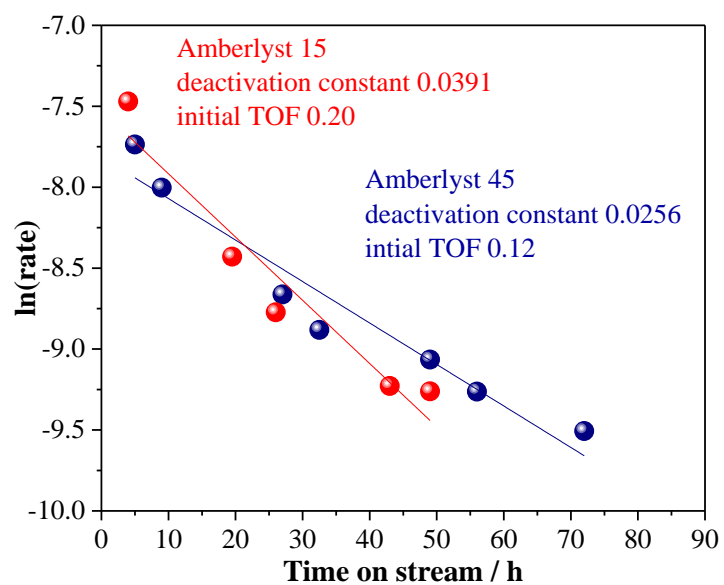

**Figure S4.** FAEE formation rate in logarithmic scale as a function of the time on stream. Reaction conditions: oil/ethanol ratio of 1/6 and temperature of 170 °C

## 5. Acidity of the fresh and used oils

The analyzes carried out following the ASTM D664 (2011). In a typical procedure, 2.0 g of oil were weighed in a 125 ml Erlenmeyer flask and 20 mL of neutral ether-alcohol solution (2:1 V:V) and two drops of the phenolphthalein indicator were added. The solution was titrated with a standard sodium hydroxide solution ( $0.0023 \text{ mol L}^{-1}$  for fresh oil and  $0.0102 \text{ mol L}^{-1}$  for used oil). The volume of base consumed in the titration is summarized in **Table S2**. The titrations were carried out in triplicate and the sodium hydroxide solutions were standardized.

**Table S2.** NaOH volume consumed and the mass of oil used in each titration

| fresh oil |              |                               | used oil |              |                               |
|-----------|--------------|-------------------------------|----------|--------------|-------------------------------|
| Sample    | Oil mass / g | $V_{\text{NaOH}} / \text{mL}$ | Sample   | Oil mass / g | $V_{\text{NaOH}} / \text{mL}$ |
| 1         | 2.04         | 8.10                          | 1        | 2.01         | 12.15                         |
| 2         | 2.07         | 8.75                          | 2        | 2.07         | 12.80                         |
| 3         | 2.04         | 8.30                          | 3        | 2.01         | 12.10                         |

The acidity was calculated as following the equation:

$$\text{Acidity} (mg_{\text{NaOH}} / g_{\text{oil}}) = \frac{\bar{V}_{\text{NaOH}} \times C_{\text{NaOH}} \times MM_{\text{NaOH}}}{m_{\text{oil}}}$$

Where:

$v_{\text{NaOH}}$  = volume (L) of NaOH consumed in the titration;

$C_{\text{NaOH}}$  = concentration ( $\text{mol L}^{-1}$ ) of the standard NaOH solution;

$MM_{\text{NaOH}}$  = molar weight of NaOH,  $40.0 \text{ g mol}^{-1}$ ;

$m$  = weight of oil used for each titration.

Using the equation above, the acidity for the fresh and used oil was  $0.38 \pm 0.01$  and  $2.48 \pm 0.03 \text{ mg}_{\text{NaOH}} \text{ g}_{\text{oil}}^{-1}$ , respectively.
